# Supplementary material for: Stabilization of the nematic mesophase by a homogeneously dissolved conjugated polymer
Source: Royal Society of Chemistry journal article supplement (doi:10.1039/c0jm00621a), 2010-01-01
Supplement: c0jm00621a.pdf [file c0jm00621a.pdf]

**Supporting Information for**

**Stabilization of the nematic mesophase by a  
homogeneously dissolved conjugated polymer**

Andreas Lohr and Timothy M. Swager\*

Massachusetts Institute of Technology, Department of Chemistry

77 Massachusetts Avenue, Cambridge, MA 02139, USA.

E-mail: [tswager@mit.edu](mailto:tswager@mit.edu)

## Optical micrographs.

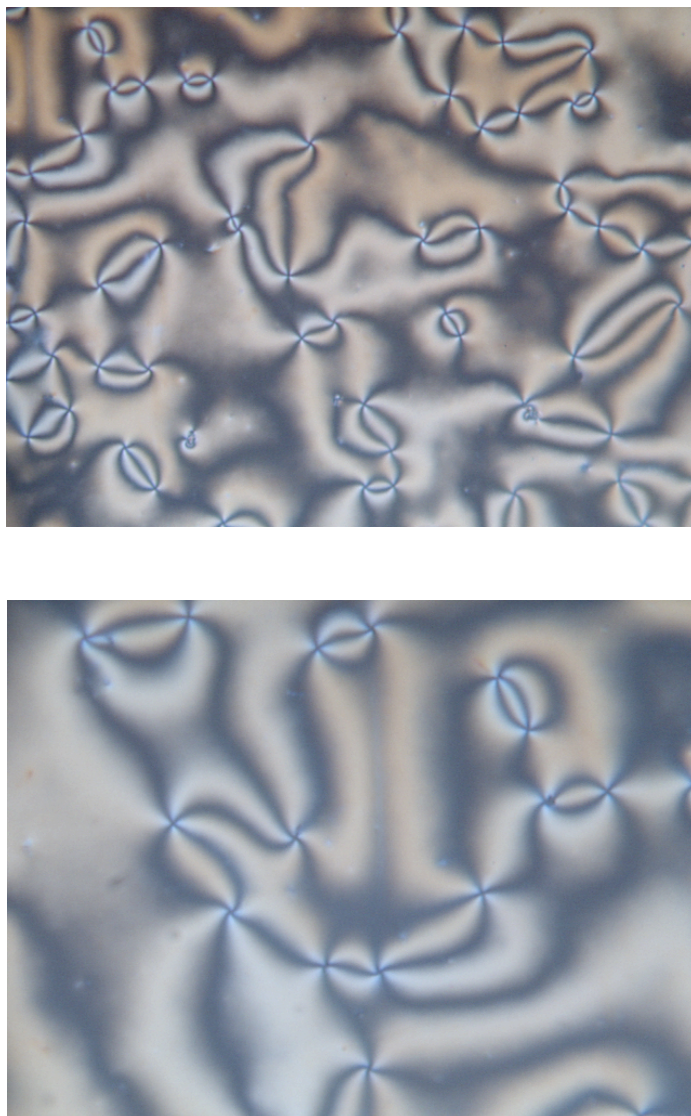

**Figure S1.** Optical micrographs with different magnification of a solution of **P1** in MLC-6884 (10 wt% **P1**) taken under crossed polarizers after slow cooling of the sample from the isotropic phase to 25 °C.

## UV/vis absorption spectra.

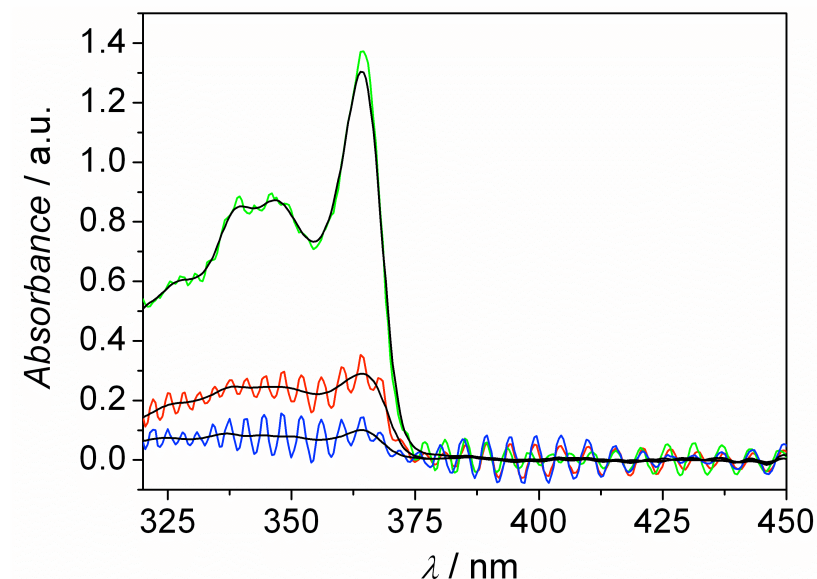

**Figure S2.** Absorption spectra of polymer **P1** dissolved in MLC-6884 (1 wt% polymer) and sandwiched between the glass slides of a test cell equipped with parallel rubbed polyimide layers for planar director alignment. The shown spectra were obtained before (red: nonpolarized light, green: light polarization parallel to the LC director, blue: light polarization perpendicular to the LC director) and after FFT filtering of the respective spectra with Origin 7 (black lines).

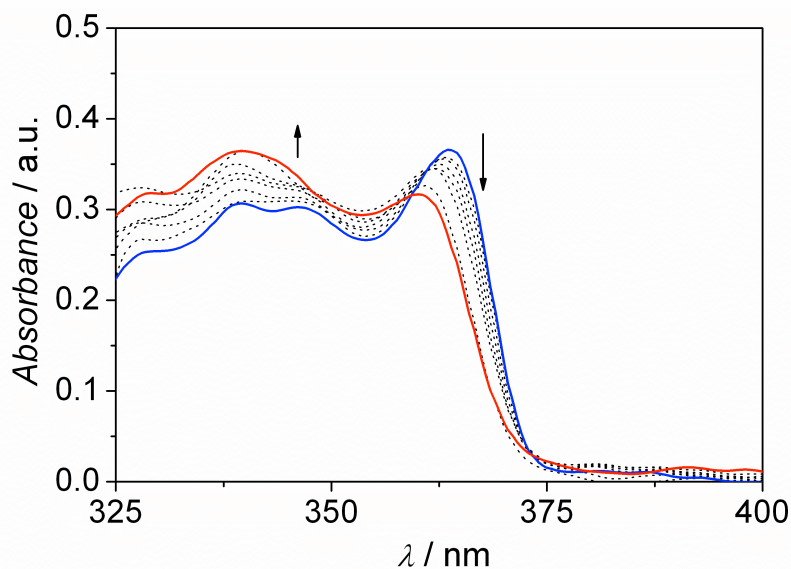

**Figure S3.** Nonpolarized temperature-dependent UV-vis absorption spectra of polymer **P1** dissolved in MLC-6884 (1 wt% polymer) and sandwiched between the glass slides of a test cell equipped with parallel rubbed polyimide layers for planar director alignment. The arrows indicate spectral changes with increasing temperature from 25 to 95 °C.

## DSC thermogram.

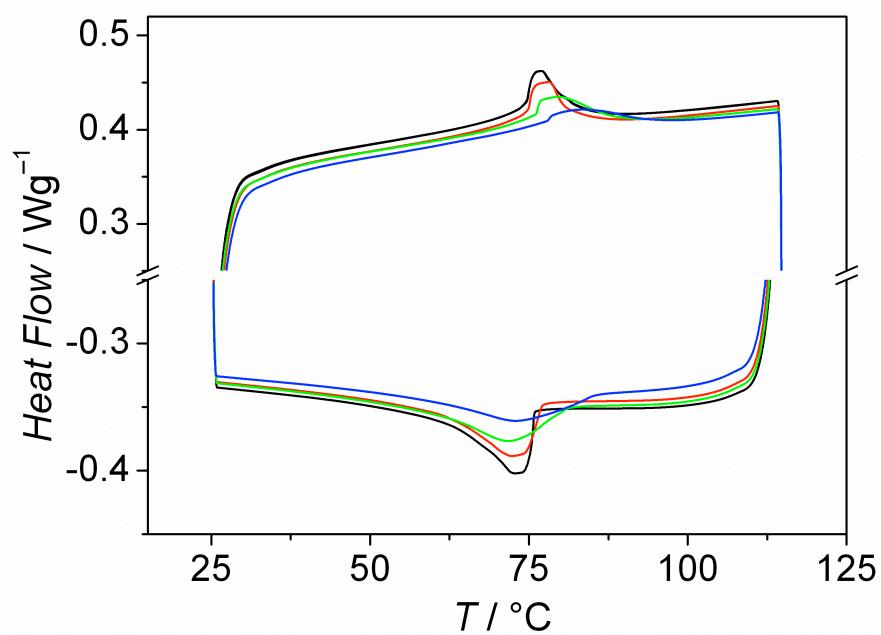

**Figure S4.** DSC thermograms of solutions of **P1** in MLC-6884 containing 0 (black), 1 (red), 5 (green), and 10 wt% (blue) **P1**. The heating/cooling rate was 10 K min<sup>-1</sup>.

**$^1\text{H}$  and  $^{13}\text{C}$  NMR spectra.**

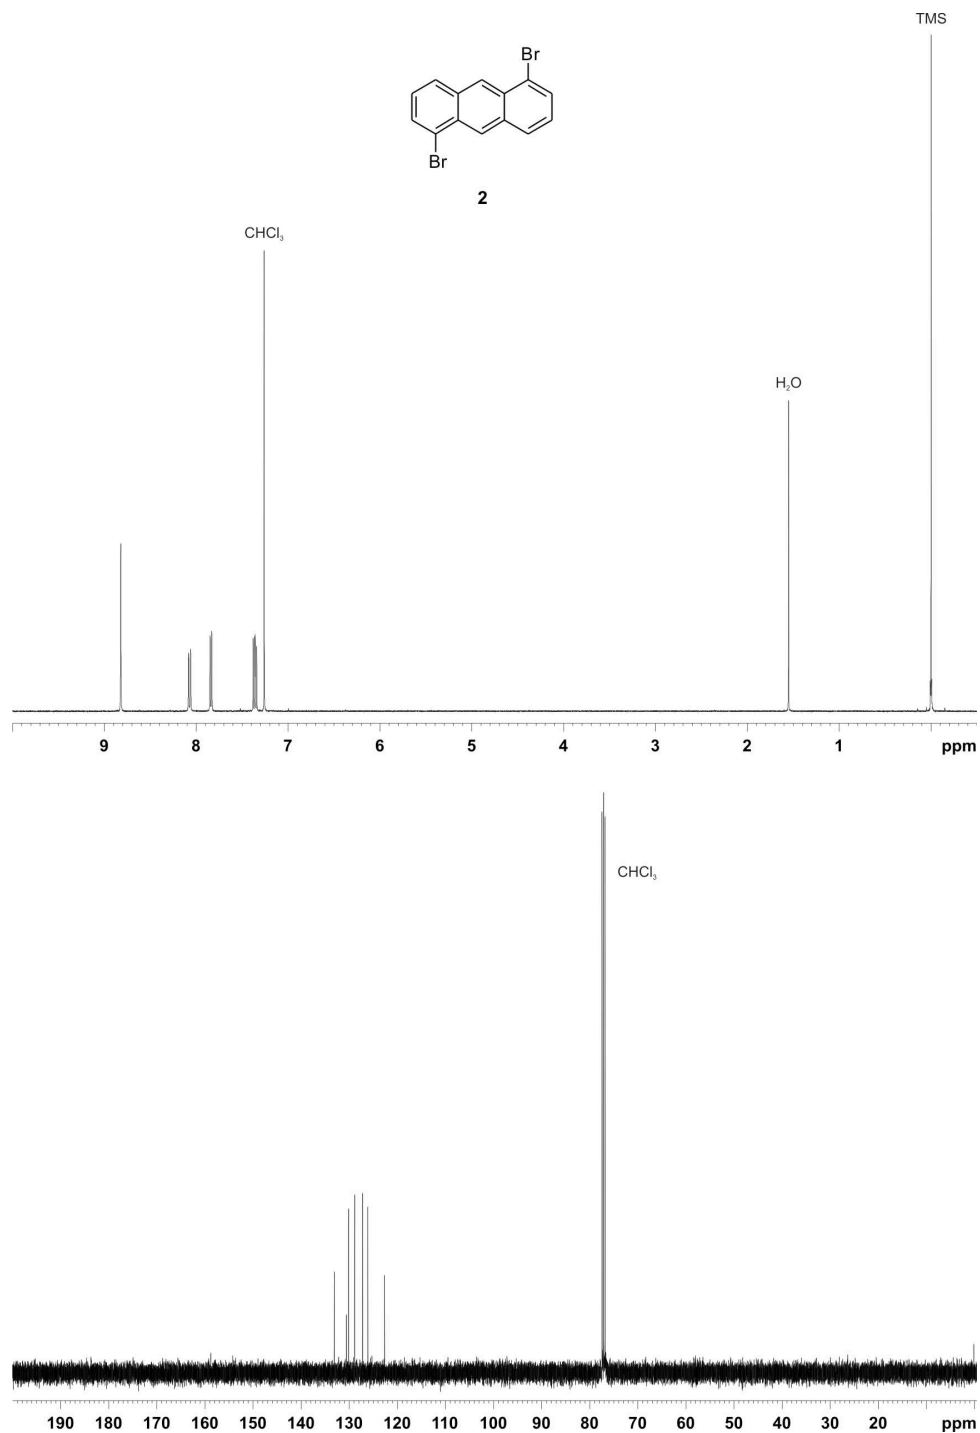

**Figure S5.**  $^1\text{H}$  (top) and  $^{13}\text{C}$  (bottom) NMR spectra of **2** in  $\text{CDCl}_3$ .

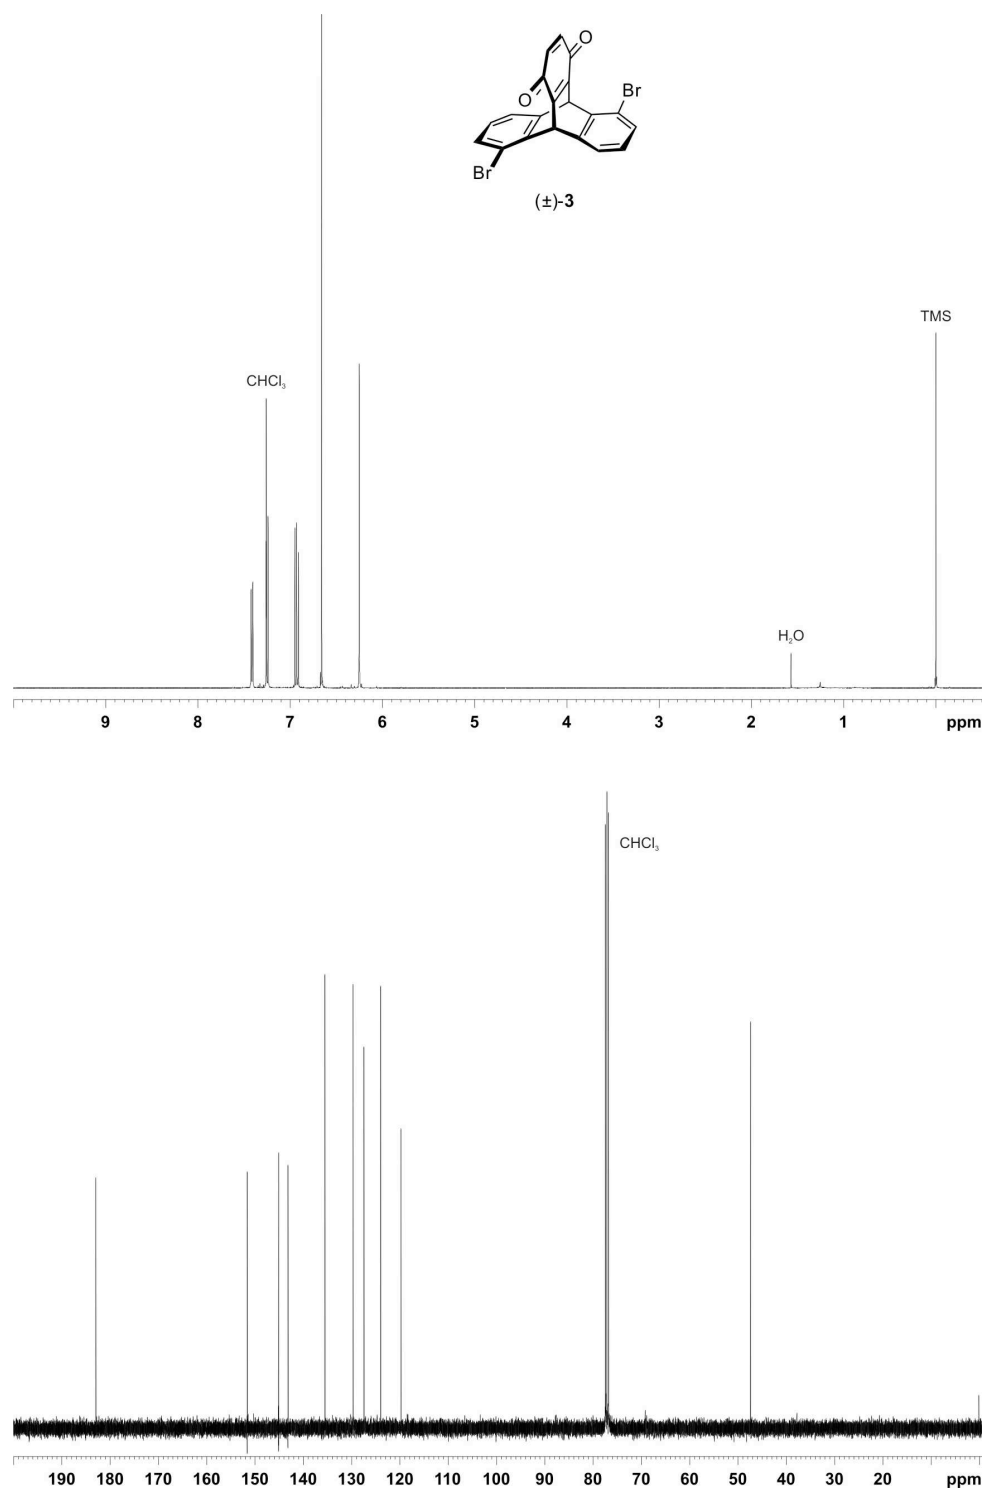

**Figure S6.**  $^1\text{H}$  (top) and  $^{13}\text{C}$  (bottom) NMR spectra of racemic triptycene quinone ( $\pm$ )-**3** in  $\text{CDCl}_3$ .

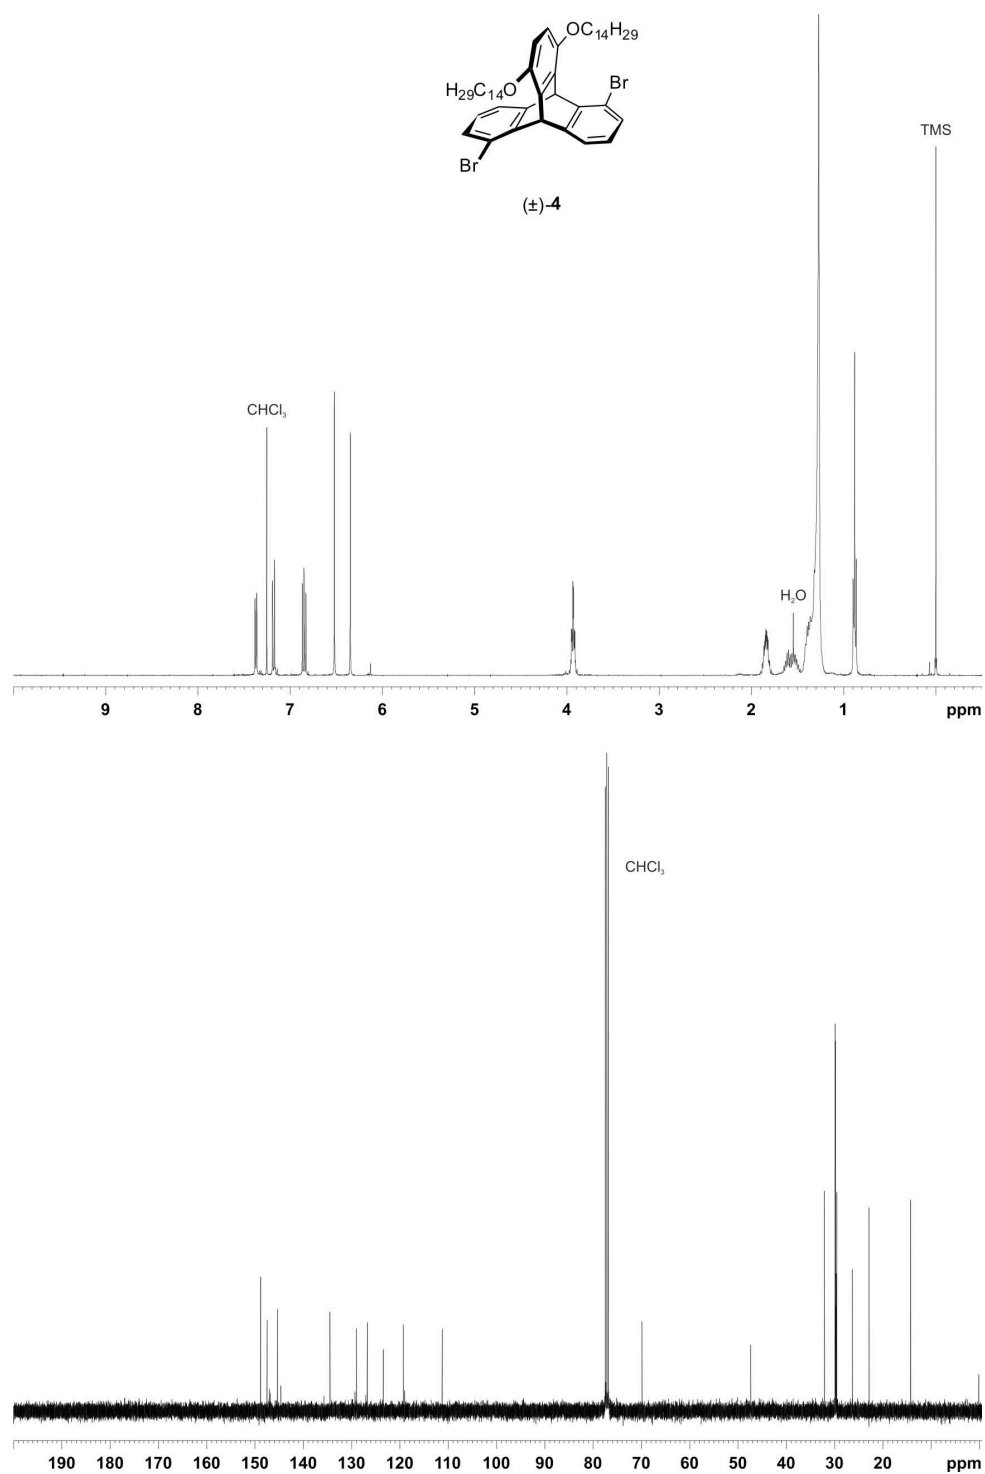

**Figure S7.**  $^1\text{H}$  (top) and  $^{13}\text{C}$  (bottom) NMR spectra of racemic dibromotriptycene ( $\pm$ )-**4** in  $\text{CDCl}_3$ .

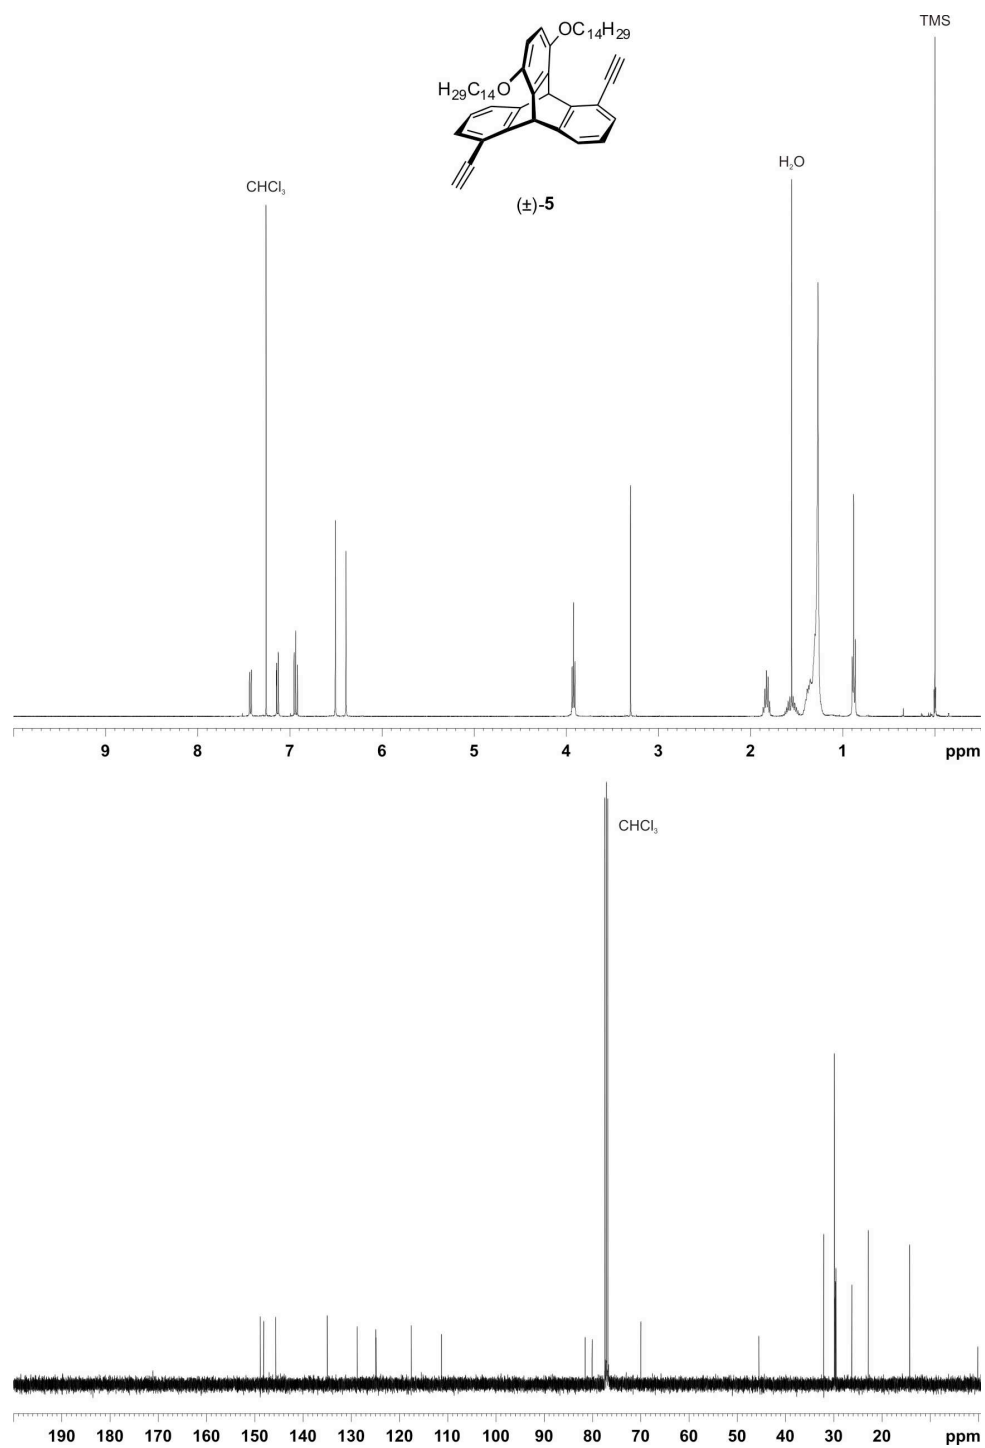

**Figure S8.**  $^1\text{H}$  (top) and  $^{13}\text{C}$  (bottom) NMR spectra of racemic triptycene monomer ( $\pm$ )-5 in  $\text{CDCl}_3$ .



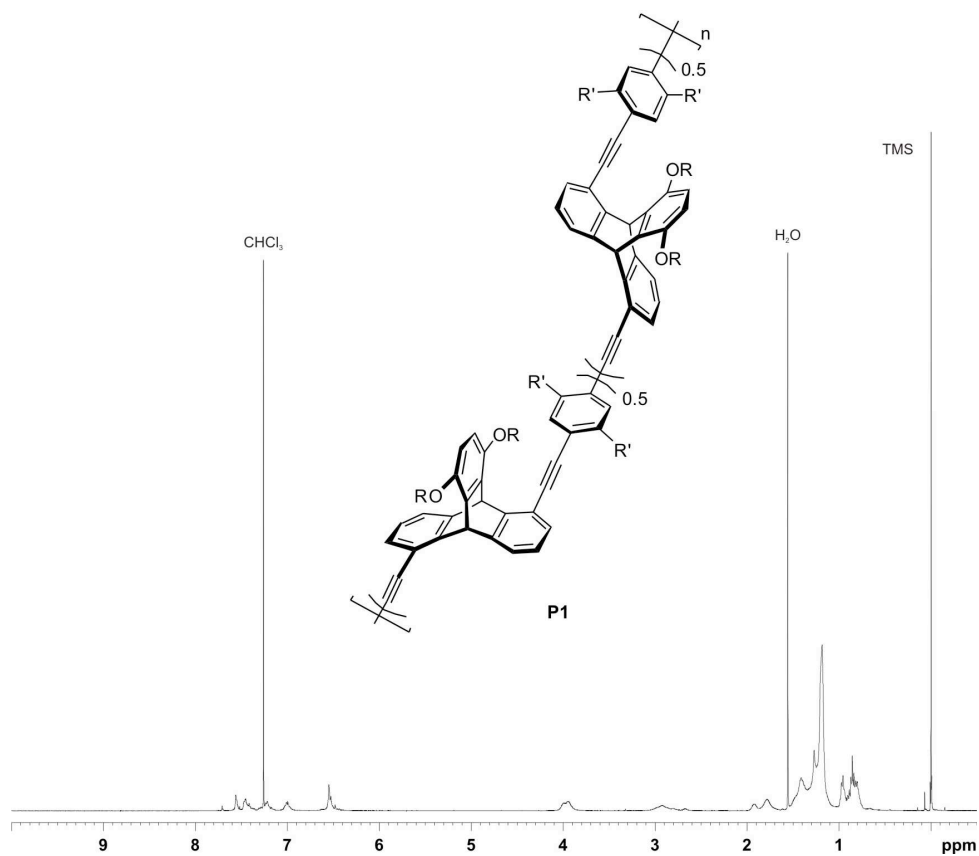

**Figure S9.**  $^1\text{H}$  NMR spectrum of polymer **P1** in  $\text{CDCl}_3$ .

## Gel permeation chromatography

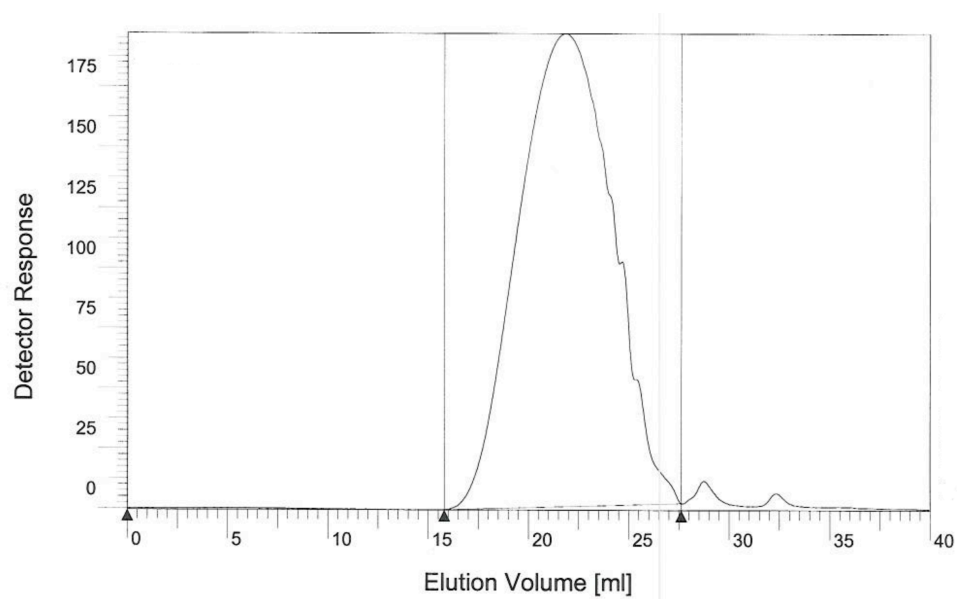

**Figure S10.** Gel permeation chromatogram of polymer **P1** (eluent: THF; detection wavelength: 254 nm).
